# Supplementary material
Source: PubMed Central journal article supplement (PMC7755072)
Supplement: NIHMS1640622-supplement-1.pdf [file NIHMS1640622-supplement-1.pdf]

**Supplementary Table 1: Univariate Logistic Regression Model Showing Risk Factors for Hepatorenal Dysfunction (MELD-XI score)**

|                                                  | $\beta \pm SE$ | p      |
|--------------------------------------------------|----------------|--------|
| Age, years                                       | 0.14±0.07      | <0.001 |
| Male sex                                         | 0.23±0.02      | <0.001 |
| Prior tricuspid valve surgery                    | ----           | ----   |
| History of atrial arrhythmia                     | 0.04±0.02      | 0.07   |
| History of ventricular arrhythmia                | ----           | ----   |
| <b>Echocardiography</b>                          |                |        |
| RA reservoir strain, %                           | -0.31±0.09     | <0.001 |
| RV global longitudinal strain                    | -0.03±0.02     | 0.08   |
| IVC collapsibility, %                            | -0.12±0.05     | 0.02   |
| Estimated RA pressure, mmHg                      | -0.15±0.09     | 0.006  |
| ≥Moderate TR severity                            | ----           | ----   |
| TR velocity, m/s                                 | ----           | ----   |
| Estimated RVSP, mmHg                             | ----           | ----   |
| LA reservoir strain, %                           | ----           | ----   |
| LV end-diastolic volume index, ml/m <sup>2</sup> | ----           | ----   |
| LV end-systolic volume index, ml/m <sup>2</sup>  | 0.05±0.03      | 0.03   |
| LV stroke volume index, ml/m <sup>2</sup>        | -0.09±0.01     | <0.00  |
| LV global longitudinal strain, %                 | -0.16±0.11     | 0.07   |
| Lateral mitral E/e'                              | ---            | ---    |

RA: Right atrium; RV: Right ventricle; TR: Tricuspid regurgitation; LV: Left ventricle; E/e': ratio of mitral inflow pulsed wave Doppler early velocity to mitral annular tissue Doppler early velocity

Only variables with p < 0.1 are listed while variables with p ≥ 0.1 are represented by (---).

**Supplementary Table 2: Univariate Cox Regression Model Showing Risk Factors for Death and/or Transplant**

|                                   | <b>HR (95%CI)</b> | <b>p</b> |
|-----------------------------------|-------------------|----------|
| MELD score                        | 1.52 (1.21-3.14)  | <0.001   |
| Age, years                        | 1.04 (1.02-1.06)  | <0.001   |
| Male sex                          | ---               | ---      |
| Prior tricuspid valve surgery     | ---               | ---      |
| History of atrial arrhythmia*     |                   |          |
| History of atrial fibrillation    | 2.29 (1.31-4.11)  | 0.004    |
| History of ventricular arrhythmia | ---               | ---      |
| <b>Medications</b>                |                   |          |
| Loop diuretics                    | 3.71 (2.15-6.54)  | <0.001   |
| Beta blockers                     | 2.16 (1.18-3.82)  | 0.009    |
| ACEI/ARB                          | 3.14 (1.74-5.53)  | 0.002    |
| <b>Echocardiography</b>           |                   |          |
| RA reservoir strain, %            | 0.82 (0.75-0.88)  | <0.001   |
| RV global longitudinal strain     | 0.90 (0.83-0.98)  | 0.03     |
| IVC collapsibility,%              | 0.84 (0.79-0.89)  | <0.001   |
| Estimated RA pressure, mmHg       | 1.15 (1.09-1.22)  | <0.001   |
| ≥Moderate TR severity             | ---               | ---      |
| TR velocity, m/s                  | ---               | ---      |
| Estimated RVSP, mmHg              | ---               | ---      |
| LA reservoir strain, %            | 0.79 (0.70-0.87)  | <0.001   |
| LV global longitudinal strain, %  | 0.75 (0.64-0.88)  | 0.005    |
| Lateral mitral E/e'               | 1.11 (1.02-1.02)  | 0.02     |

MELD: Model for end-stage liver disease; RA: Right atrium; RV: Right ventricle; TR: Tricuspid regurgitation; LV: Left ventricle; E/e': ratio of mitral inflow pulsed wave Doppler early velocity to mitral annular tissue Doppler early velocity; HR: Hazard ratio; CI: Confidence interval

Only variables with  $p < 0.1$  are listed while variables with  $p \geq 0.1$  are represented by (---).

\*History of atrial arrhythmia\* represents all atrial arrhythmias including atrial flutter, atrial tachycardia, and atrial fibrillation

**Supplementary Table 3: Baseline Characteristics**

|                                           | Patients included in cohort #2 (n=416) | Patients not included in cohort #2 (n=276) | p    |
|-------------------------------------------|----------------------------------------|--------------------------------------------|------|
| Age, years                                | 39±13                                  | 40±17                                      | 0.6  |
| Male                                      | 163 (40%)                              | 118 (42%)                                  | 0.1  |
| <b>Comorbidities</b>                      |                                        |                                            |      |
| Hypertension                              | 88 (21%)                               | 51 (19%)                                   | 0.4  |
| Diabetes                                  | 21 (5%)                                | 11 (4%)                                    | 0.8  |
| History of atrial arrhythmia              | 165 (40%)                              | 136 (49%)                                  | 0.02 |
| History of ventricular arrhythmia         | 20 (5%)                                | 12 (4%)                                    | 0.8  |
| <b>Medications</b>                        |                                        |                                            |      |
| Loop diuretics                            | 81 (19%)                               | 65 (24%)                                   | 0.2  |
| Beta blockers                             | 95 (23%)                               | 72 (26%)                                   | 0.5  |
| ACEI/ARB                                  | 76 (18%)                               | 53 (19%)                                   | 0.7  |
| Aldosterone antagonist                    | 22 (5%)                                | 21 (8%)                                    | 0.2  |
| <b>Echocardiography</b>                   |                                        |                                            |      |
| RA reservoir strain, %                    | 32±10                                  | 29±9                                       | 0.08 |
| Estimated RA pressure, mmHg               | 8±4                                    | 9±4                                        | 0.7  |
| LV stroke volume index, ml/m <sup>2</sup> | 37±8                                   | 33±7                                       | 0.1  |
| <b>Hepatorenal function</b>               |                                        |                                            |      |
| MELD-XI score                             | 9.8 (9.4-12.1)                         | 10.6 (9.8-13.8)                            | 0.5  |

ACEI: Angiotensin converting enzyme inhibitor; ARB: Angiotensin II receptor blockers; RA: Right atrium; LV: Left ventricle; MELD: Model for end-stage liver disease excluding international normalized ratio

**Supplementary Table 4:: Baseline Characteristics**

|                                           | Patients included in cohort #3 (n=344) | Patients not included in cohort #3 (n=348) | p     |
|-------------------------------------------|----------------------------------------|--------------------------------------------|-------|
| Age, years                                | 41±16                                  | 39±15                                      | 0.2   |
| Male                                      | 144 (42%)                              | 137 (39%)                                  | 0.5   |
| <b>Comorbidities</b>                      |                                        |                                            |       |
| Hypertension                              | 71 (22%)                               | 64 (18%)                                   | 0.5   |
| Diabetes                                  | 17 (5%)                                | 15 (4%)                                    | 0.8   |
| History of atrial arrhythmia              | 165 (40%)                              | 136 (49%)                                  | 0.02  |
| History of ventricular arrhythmia         | 19 (6%)                                | 13 (4%)                                    | 0.3   |
| <b>Medications</b>                        |                                        |                                            |       |
| Loop diuretics                            | 84 (24%)                               | 62 (18)                                    | 0.2   |
| Beta blockers                             | 91 (27%)                               | 76 (22%)                                   | 0.3   |
| ACEI/ARB                                  | 71 (21%)                               | 58 (17%)                                   | 0.5   |
| Aldosterone antagonist                    | 23 (7%)                                | 20 (6%)                                    | 0.6   |
| <b>Echocardiography</b>                   |                                        |                                            |       |
| RA reservoir strain, %                    | 28±8                                   | 23±7                                       | 0.008 |
| Estimated RA pressure, mmHg               | 9±4                                    | 7±3                                        | 0.2   |
| LV stroke volume index, ml/m <sup>2</sup> | 32±7                                   | 38±10                                      | 0.09  |
| <b>Hepatorenal function</b>               |                                        |                                            |       |
| MELD-XI score                             | 10.7 (10.1-14.3)                       | 9.6 (8.9-12.7)                             | 0.1   |

ACEI: Angiotensin converting enzyme inhibitor; ARB: Angiotensin II receptor blockers; RA: Right atrium; LV: Left ventricle; MELD: Model for end-stage liver disease excluding international normalized ratio

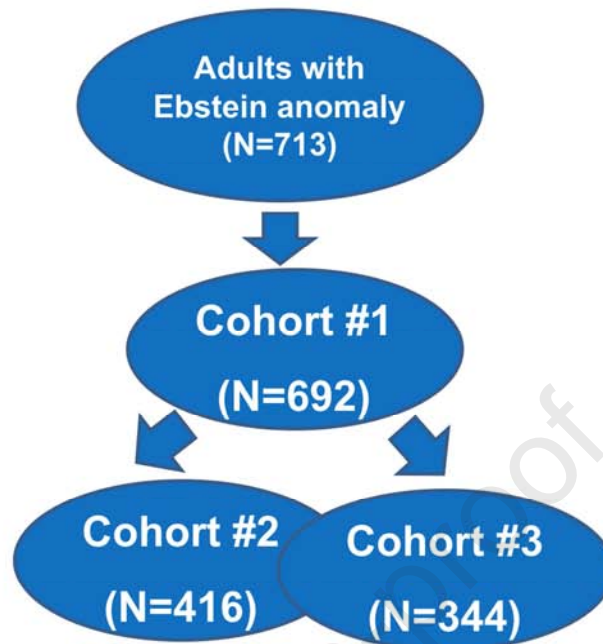

**Supplementary Figure 1**

There were 713 adult patients with Ebstein anomaly that received care at Mayo Clinic Rochester MN (2000 – 2018)

**Cohort #1:** Consecutive patients that had at least one comprehensive metabolic panel (CMP) performed in the outpatient clinic and at least one year follow-up.

**Cohort #2:** Consecutive patients that had 2 CMPs performed at least 24 months apart without any surgical or transcatheter procedures between both tests.

**Cohort #3:** Consecutive patients that had preoperative CMP (within 3 months prior to surgery) and postoperative CMP (at least 12 months after surgery)
